# Supplementary material for: Soft robotic shorts improve outdoor walking efficiency in older adults
Source: Research Square preprint supplement (doi:10.21203/rs.3.rs-3744597/v1), 2024-02-13
Supplement: Supplementary file 1 [file 897244aa56345a8a5ddb1ee8.pdf]

# Soft robotic shorts improve outdoor walking efficiency in older adults

Enrica Tricomi<sup>1\*</sup>, Francesco Missiroli<sup>†1</sup>, Michele Xiloyannis<sup>†2</sup>, Nicola Lotti<sup>1</sup>, Xiaohui Zhang<sup>1</sup>, Marios Stefanakis<sup>3,4</sup>, Maximilian Theisen<sup>5</sup>, Jürgen Bauer<sup>3,4</sup>, Clemens Becker<sup>3,4</sup> and Lorenzo Masia<sup>1</sup>

<sup>1</sup>Institut für Technische Informatik (ZITI), Heidelberg University, Heidelberg, Germany.

<sup>2</sup>Akina AG, Zürich, Switzerland.

<sup>3</sup>Digital Unit, Center for Geriatric Medicine, Heidelberg University Hospital, Heidelberg, Germany.

<sup>4</sup>Network Aging Research, Heidelberg University, Heidelberg, Germany.

<sup>5</sup>Psychological Institute, Heidelberg University, Heidelberg, Germany.

\*Corresponding author. E-mail: [enrica.tricomi@ziti.uni-heidelberg.de](mailto:enrica.tricomi@ziti.uni-heidelberg.de);

Contributing authors: † These authors contributed equally to this work;

## SUPPLEMENTARY INFORMATION

### This PDF file includes

1. Model for tendons displacement during walking
2. WalkON controller pseudocode
3. WalkON design: a comparative study on two hardware configurations in young adults hiking

### Other Supplementary material

1. CAD files
2. Bill of Materials
3. Recorded data and scripts for analyses
4. Video accompanying the paper

## 27 Model for tendons displacement during walking

28 The displacement of artificial tendons in *WalkON* is controlled based on the  
 29 kinematics of the hip joint and its progression throughout the gait cycle.

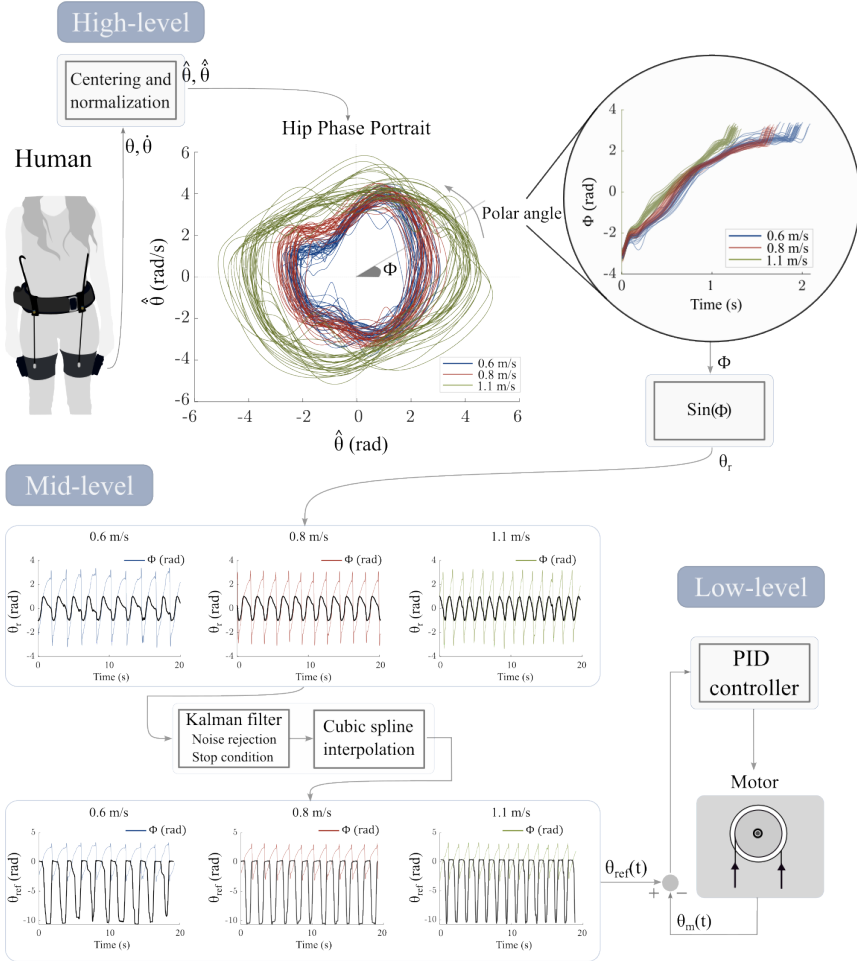

**Fig. 1 Schematic representation of the control algorithm for *WalkON*.** The control algorithm, illustrated with input signals and the corresponding processed outputs for three exemplary walking speeds, enables control of the artificial tendons by processing hip joint kinematic inputs and translating them into a reference trajectory for the actuator. At the high-level, the controller maps the circular motion of the hip joint's position and velocity, as presented in the hip phase portrait. From this mapping, it extracts a linearly increasing variable, which represents the gait phase, from the angle between the hip position and velocity during each step. At the mid-level, the controller employs a Kalman filter to enhance the signal's robustness against sensor noise. Subsequently, it generates a reference position trajectory for the actuator using cubic spline interpolation. Finally, the low-level controller manages feedback positioning of the artificial tendons.

The control algorithm analyzes motion information to generate a consistent motor actuator reference trajectory. This algorithm is composed of three layers, responsible for estimating the gait phase from kinematic data, generating the actuator reference motion based on the user's gait phase, and controlling the actuators (Fig. 1).

**High-level controller** A monotonically increasing gait phase variable is reconstructed from a single inertial sensor on each leg, measuring the hip angle  $\theta(t)$  and the hip velocity  $\dot{\theta}(t)$  in the sagittal plane. The polar angle between the two quantities is an indication of the progression of the gait phase,  $\phi(t)$ , along the gait cycle and is computed through the following equation, presented in the Iverson bracket notation:

$$\phi(t) = \text{atan} \left( \frac{\dot{\hat{\theta}}(t)}{\hat{\theta}(t)} \right) [\hat{\theta}(t) \neq 0] + \eta(t); \quad (1)$$

where  $\hat{\theta}(t)$  and  $\dot{\hat{\theta}}(t)$  are the hip angular position and velocity after normalization and centering;  $\eta(t)$  is a corrective factor that takes into account that for each value of  $\theta(t)$  there are at least two solutions due to the back and forth movement. The correct value of  $\phi(t)$  can be disambiguated by summing the *sign* function of the hip angular velocity; then  $\eta(t)$  is defined as:

$$\eta(t) = \text{sgn}(\dot{\hat{\theta}}(t)) \left( \pi [\hat{\theta}(t) < 0] + \frac{\pi}{2} [\hat{\theta}(t) = 0] \right) \quad (2)$$

For the centering and normalization of  $\theta(t)$  and  $\dot{\theta}(t)$  we adopted a method based on Quintero et al.<sup>1</sup>: for each step, both variables are shifted about the origin of the hip phase portrait and  $\theta(t)$  is re-scaled to match the amplitude

49 of  $\dot{\theta}(t)$ :

$$\hat{\theta}(t) = \frac{|\dot{\theta}_{max_i}(t) - \dot{\theta}_{min_i}(t)|}{|\theta_{max_i}(t) - \theta_{min_i}(t)|} \left( \theta(t) - \frac{\theta_{max_i}(t) + \theta_{min_i}(t)}{2} \right) \quad (3)$$

$$\dot{\hat{\theta}}(t) = \dot{\theta}(t) - \frac{\dot{\theta}_{max_i}(t) + \dot{\theta}_{min_i}(t)}{2} \quad (4)$$

50 where the maximum and minimum values of  $\theta(t)$  and  $\dot{\theta}(t)$  are related to the  
 51  $i^{th}$  stride and are identified as the times in which the derivative of the signals,  
 52  $\dot{\theta}(t)$  and  $\ddot{\theta}(t)$  respectively, crosses the zero. These steps are needed to make  
 53 the walking limit cycle as circular as possible, thus increasing the linearity of  
 54  $\phi(t)$  in each stride. Finally,  $\phi(t)$  is transformed into  $\sin(\phi(t))$  to approximate  
 55 the sinusoidal-like behaviour of the hip joint in the sagittal plane. This signal  
 56 is referred to as  $\theta_r(t)$  and lays the foundation for the derivation of the motor  
 57 reference motion.

58 **Mid-level controller** The gait phase extraction method implemented at  
 59 the High-Level shows high sensitivity to the noise captured from the inertial  
 60 sensors (e.g., during heel strike at sustained speed or due to shifting movements  
 61 of the textile frame on the user's thigh), that transfer to the motor reference  
 62 motion signal  $\theta_r(t)$ . Therefore, in order to increase the robustness of the control  
 63 strategy to noise, we implemented a Kalman Filter<sup>2</sup> in cascade to the gait  
 64 phase estimator:

$$\begin{bmatrix} \hat{\theta}_{r_t} \\ \hat{\dot{\theta}}_{r_t} \end{bmatrix} = A \begin{bmatrix} \hat{\theta}_{r_{t-1}} \\ \hat{\dot{\theta}}_{r_{t-1}} \end{bmatrix} + K_t \left( \theta_{r_t} - C \begin{bmatrix} \hat{\theta}_{r_{t-1}} \\ \hat{\dot{\theta}}_{r_{t-1}} \end{bmatrix} \right) \quad (5)$$

being  $\begin{bmatrix} \hat{\theta}_{r_t} \\ \hat{\dot{\theta}}_{r_t} \end{bmatrix}$  the current state estimate (i.e., motor reference trajectory and its derivative),  $\begin{bmatrix} \hat{\theta}_{r_{t-1}} \\ \hat{\dot{\theta}}_{r_{t-1}} \end{bmatrix}$  the predicted state estimate given past measurements of  $\theta_r(t)$  up to time  $t-1$ , and being  $\theta_r(t)$  the current approximated motor reference trajectory. We set the system matrix  $A$ , and the output matrix  $C$  as follows:

$$A = \begin{bmatrix} 1 & \Delta t \\ 0 & 1 \end{bmatrix}; C = \begin{bmatrix} 1 & 0 \end{bmatrix} \quad (6)$$

being  $\Delta t$  the time frame for each update cycle set to 0.01. The term  $K_t$  is the Kalman gain and it is used to determine noise characteristics, set by means of a process noise covariance matrix  $Q$  and a measurements noise covariance matrix  $R$ , such that:

$$K_t = (APC^T)(CPC^T + R)^{-1} \quad (7)$$

where  $P$  is the state covariance matrix chosen to minimize the error in the estimate and it is defined as:

$$P = AP_{t-1}A^T + Q \quad (8)$$

$$Q = \begin{bmatrix} 0.02 & 0 \\ 0 & 0.02 \end{bmatrix}; R = 0.75 \quad (9)$$

We obtained the actuator's final position reference trajectory,  $\theta_{\text{ref}}(t)$ , by using a motion mapping method that employed cubic spline interpolation of the sinusoidal profile  $\theta_r(t)$ .

**Low-Level controller** A feedback position loop compares the actual posi-

tion of the motor  $\theta_m(t)$  with the reference position  $\theta_{\text{ref}}(t)$  extracted from the

previous layer. To convert the position error ( $\theta_{\text{ref}}(t) - \theta_m(t)$ ) into motor angular

velocity, we used a Proportional-Differential (PD) controller having transfer

function:

$$Y(s) = \frac{K_p}{1 + K_d \cdot s} \quad (10)$$

where gains  $K_p$ ,  $K_i$ , and  $K_d$  were tuned using the Ziegler-Nichols heuristic

method in preliminary trials to accurately follow the desired  $\theta_{\text{ref}}(t)$ .

**Stop condition** The stop detection condition is implemented based on the

gait speed. The gait speed ( $s_{\text{gait}}$ ) is estimated from the vector norm between

$\hat{\theta}(t)$  and  $\hat{\dot{\theta}}(t)$  (i.e., polar radius) in the hip phase portrait<sup>1</sup>:

$$s_{\text{gait}} = \sqrt{\hat{\theta}(t)^2 + \hat{\dot{\theta}}(t)^2} \quad (11)$$

which is compared to a pre-defined stop threshold experimentally determined

on the basis of kinematic sensors noise at rest. Whether the stop condition

is met,  $\hat{\theta}_r(t)$  is set to zero prior to the application of the Kalman Filter and

subsequent interpolation, in order to allow the actuator reference signal to

smoothly approach zero thanks to the dynamic behaviour of the filter and thus

avoiding abrupt changes and/or discontinuities.

---

**Algorithm 1** *WalkON* Control Algorithm

---

```

1: function HIGH_LEVEL_CONTROLLER( $\theta, \dot{\theta}$ )
2:    $\hat{\theta}, \dot{\hat{\theta}} \leftarrow \text{NORMALIZE\_AND\_CENTER}(\theta, \dot{\theta})$ 
3:    $\phi \leftarrow \text{CALCULATE\_GAIT\_PHASE}(\hat{\theta}, \dot{\hat{\theta}})$ 
4:    $\theta_r \leftarrow \sin(\phi)$ 
5:   return  $\theta_r$ 
6: end function
7:
8: function MID_LEVEL_CONTROLLER( $\theta_r, \Delta_t, q, r$ )
9:    $A \leftarrow \begin{bmatrix} 1 & \Delta_t \\ 0 & 1 \end{bmatrix}, C \leftarrow \begin{bmatrix} 1 \end{bmatrix}, Q \leftarrow \begin{bmatrix} q & 0 \\ 0 & q \end{bmatrix}, R \leftarrow r$ 
10:   $\text{current\_state} \leftarrow \text{KALMAN\_FILTER}(\theta_r, A, C, Q, R)$ 
11:   $\theta_{\text{ref}} \leftarrow \text{CUBIC\_SPINE\_INTERPOLATION}(\text{current\_state})$ 
12:  return  $\theta_{\text{ref}}$ 
13: end function
14:
15: function LOW_LEVEL_CONTROLLER( $\theta_{\text{ref}}, \theta_m$ )
16:   $\text{motor\_velocity} \leftarrow \text{PD\_CONTROLLER}(\theta_{\text{ref}} - \theta_m)$ 
17:  return  $\text{motor\_velocity}$ 
18: end function
19:
20: function MAIN_CONTROLLER( $\theta, \dot{\theta}, \Delta_t, q, r, \theta_m$ )
21:   $\theta_r \leftarrow \text{HIGH\_LEVEL\_CONTROLLER}(\theta, \dot{\theta})$ 
22:   $\theta_{\text{ref}} \leftarrow \text{MID\_LEVEL\_CONTROLLER}(\theta_r, \Delta_t, q, r)$ 
23:   $\text{motor\_velocity} \leftarrow \text{LOW\_LEVEL\_CONTROLLER}(\theta_{\text{ref}}, \theta_m)$ 
24:  return  $\text{motor\_velocity}$ 
25: end function
26:
27: function STOP_CONDITION( $\hat{\theta}, \dot{\hat{\theta}}, \text{stop\_threshold}$ )
28:   $s_{\text{gait}} \leftarrow \sqrt{\hat{\theta}^2 + \dot{\hat{\theta}}^2}$ 
29:  if  $s_{\text{gait}} < \text{stop\_threshold}$  then
30:    return True
31:  else
32:    return False
33:  end if
34: end function
35:
36: MAIN CODE
37: while True do
38:    $\theta, \dot{\theta} \leftarrow \text{READ\_SENSORS}$ 
39:   if not STOP_CONDITION() then
40:      $\text{motor\_velocity} \leftarrow \text{MAIN\_CONTROLLER}(\theta, \dot{\theta}, \Delta_t, q, r, \theta_m)$ 
41:     ACTUATE_MOTOR( $\text{motor\_velocity}$ )
42:   else
43:     STOP_MOTOR
44:   end if
45: end while

```

---

## WalkON design: a comparative study on two hardware configurations in young adults hiking

*WalkON* was conceived primarily with the objective of capitalizing on lightweight design, efficient weight distribution, and a comfortable textile interface. In reference to the first two aspects, in the current literature, an ongoing debate exists between two different design configurations for wearable assistive robotic devices<sup>3</sup>: underactuated systems (with fewer motors per assisted degrees of freedom)<sup>4,5,6</sup> and fully-actuated systems (with one motor per assisted degree of freedom)<sup>7,8,9</sup>. Underactuated assistive devices have a simpler and lighter design due to fewer motors, making them energy-efficient and capable of leveraging the synergistic nature of human movements. In contrast, fully-actuated systems offer precise and independent joint control, providing adaptability to user needs and environmental conditions, broadening their application range.

### Investigated hardware configurations

To investigate the best actuation approach to assist hip flexion in outdoor unstructured walking, we developed two distinct mechanical configurations for *WalkON* (Fig. 2) and conducted a comparative study with young adults on the hiking trail (Fig. 3). Comparison between the biomechanical effects of these two hardware configurations is the outcome of this study and was meant to determine the strategy offering greater metabolic benefits.

Both *WalkON* designs share primary hardware components and the controller, but their mechanical actuation principle sets them apart: one is an underactuated system, while the other is fully-actuated. The two different designs will be referred to in the following as *WalkON -U* and *WalkON -F* to indicate their underactuated and fully-actuated nature respectively.



Specifically, *WalkON -U* employs a single centrally located motor (AK80-6, 122 12Nm peak torque, T-MOTOR, China) equipped with a double-layer pulley 123 (diameter 78mm). It utilizes centrally back-located weight distribution and 124 symmetrically couples the two legs in a single assistance profile, with the 125 motor alternately pulling and releasing the two artificial tendons based on 126 the contralateral leg's gait phase shift. On the other hand, *WalkON -F* is a 127 fully-actuated system with two motors (AK60-6, 9Nm peak torque, T-Motor, 128 China), each wrapping up the artificial tendon of the respective leg on spools 129 with a diameter of 35mm. This design allows independence between assisted 130 legs, enabling adjustments in the assistance profile to accommodate more com- 131 plex movements and a broader range of motion. Each device weighs less than 132 3kg, with *WalkON -U* weighing 2.77 kg and *WalkON -F* weighing 2.93 kg. 133 Actuation and electronics account for the 5% difference in weight between the 134 two systems and comprise most of the device's total weight. These compo- 135 nents are located on the backside of the waist, approximately at the level of 136 the user's center of mass, to minimize the impact of the extra mass on the 137 metabolic energy expenditure during walking<sup>10</sup>. Both *WalkON* configurations 138 are represented in Fig. 2. 139

## Controller generalization to hardware configuration 140

The model outlined in the previous section for controlling tendon displace- 141 ments during walking represents a general framework applicable to any 142 tendon-driven system intended to assist walking, and can be generalized to the 143 hardware configuration. In this comparative study, we preserved the core of 144 the controller for both *WalkON -U*, the underactuated system, and *WalkON* 145 *-F*, the fully actuated systems, in order to allow comparison of results between 146 the two devices. We solely adjusted the inputs and outputs of the controller to 147

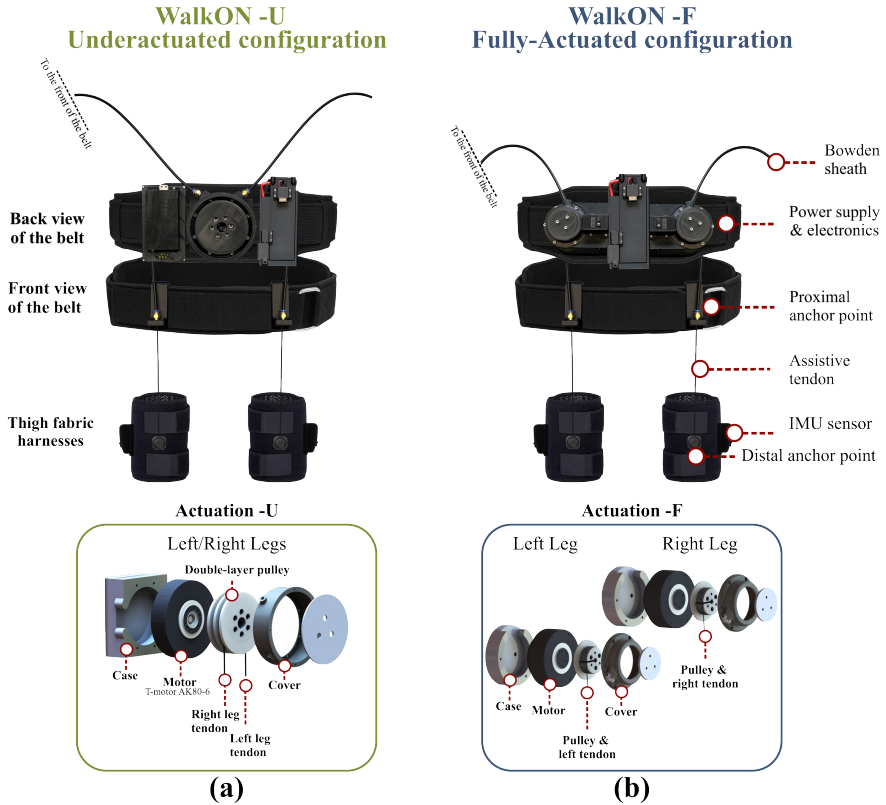

**Fig. 2 WalkON configurations** (a) *WalkON -U* features a single centrally located motor and a double layer pulley wrapping up the two artificial assistive tendons in opposite directions. (b) *WalkON -F* features one actuator per leg such that the two artificial assistive tendons remain independent.

148 account for the specific underactuated or fully-actuated nature of the device  
149 as follows.

150 **WalkON -U** To control the underactuated system, the inter-limb flexion  
151 angle obtained from the two IMUs is used as the input signal to the controller.  
152 This angle represents the difference between the right and left hip angles and  
153 results in a symmetrical sinusoidal-like trend, where positive values correspond  
154 to the displacement of the right leg, and negative values indicate the displace-  
155 ment of the left leg. Accordingly, the controller generates a motion inversion  
156 of the motor that is symmetrical, such that during the flexion of the right leg,

the right tendon is pulled while the left tendon is released by the same amount, 157  
and vice versa during the flexion of the left leg. 158

**WalkON -F** In the case of a fully-actuated system with one motor per 159  
leg, the control strategy is independent between the two legs and uses the 160  
respective hip flexion angle as the input signal. In this hardware configuration, 161  
the controller output is an asymmetrical motor reference trajectory that wraps 162  
up the tendon during hip flexion to provide assistance and releases it to a lesser 163  
extent as the hip extends. 164

## Results of the comparative study 165

The primary aim of this comparative study is to evaluate the impact of 166  
two distinct hardware configurations in order to determine the most effective 167  
actuation strategy for assisting outdoor walking. 168

To achieve this objective, the seven young adults (age  $25.43 \pm 2.23$  years, 169  
height  $172.57 \pm 12.42$  cm, and weight  $67.57 \pm 13.06$  kg) performing the technol- 170  
ogy assessment of *WalkON* on the hiking-like trails, were instructed to walk 171  
at their preferred speed while utilizing also the underactuated system, mark- 172  
ing a third condition in addition to those detailed in the main text. Hereafter, 173  
the three conditions are referred to as: *No Assistance* (system turned off), 174  
with assistance from *WalkON -U* (underactuated configuration), and with 175  
assistance from *WalkON -F* (fully-actuated configuration). 176

After completing the 500m uphill walking (Fig. 3, Philosophenweg, Hei- 177  
delberg,  $49^{\circ}24'55.1''\text{N}$   $8^{\circ}42'00.9''\text{E}$ ), each participant retraced the same path 178  
in the opposite direction, going downhill. The walking distance for each con- 179  
dition of the study accounted then for a total of 1 km walked. Results are 180  
presented in the following separately for the the uphill and downhill sections. 181  
However, results during downhill walking are hereby included for completeness 182

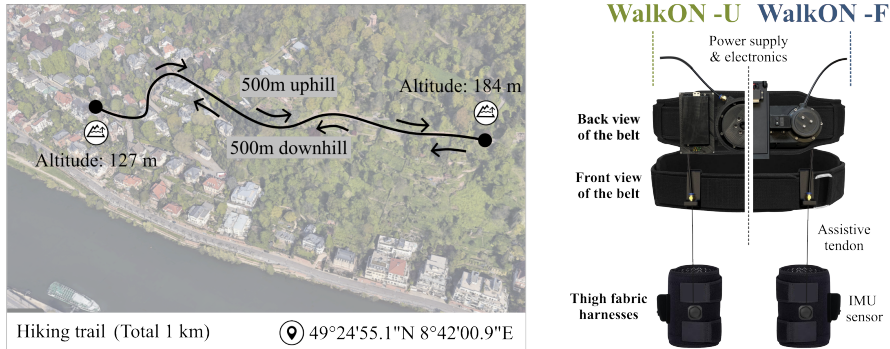

**Fig. 3** The task involved walking along a steep and winding trail (total distance 1km: 500m uphill/500m downhill). Young adults walked at their preferred pace being unassisted (*No Assistance*), utilizing the *WalkON -U* (green), and the *WalkON -F* (navy).

of evaluation, as assistance provided by *WalkON* for hip flexion is less significant during downhill tracks. This is because the swinging leg does not need to be lifted as high during downhill walking for ground clearance<sup>11</sup>. The aim of retracing the path downhill is to demonstrate that the assistive system and its weight do not impede motion or impose a metabolic burden.

The different conditions were tested on separate days to minimize any fatigue-related effects. The metabolic cost of transport, the hip joint motion, and the sense of agency were assessed as described in the main text.

## Uphill hiking

Using *WalkON -U*, the metabolic demand of traversing the outdoor uphill trail was significantly reduced by an average of  $-13.19 \pm 4.38\%$  (mean  $\pm$  s.e.m.,  $n = 7$ ,  $p = 0.007$ ), while using *WalkON -F* it was reduced by  $-17.04 \pm 3.21\%$  ( $p < 0.001$ ) (Fig. 4-(a, b)). The linear walking velocity (Fig. 4-(c)) did not show significant differences across conditions, although there was a noticeable trend a  $-6\%$  with *WalkON -U* and a  $+5\%$  increase with *WalkON -F* compared to the *No Assistance* condition.

Wearing *WalkON* did not impose any restrictions on the motion of the hip joint (Fig. 4-(d, e)). In the absence of assistance (*No Assistance*), the average

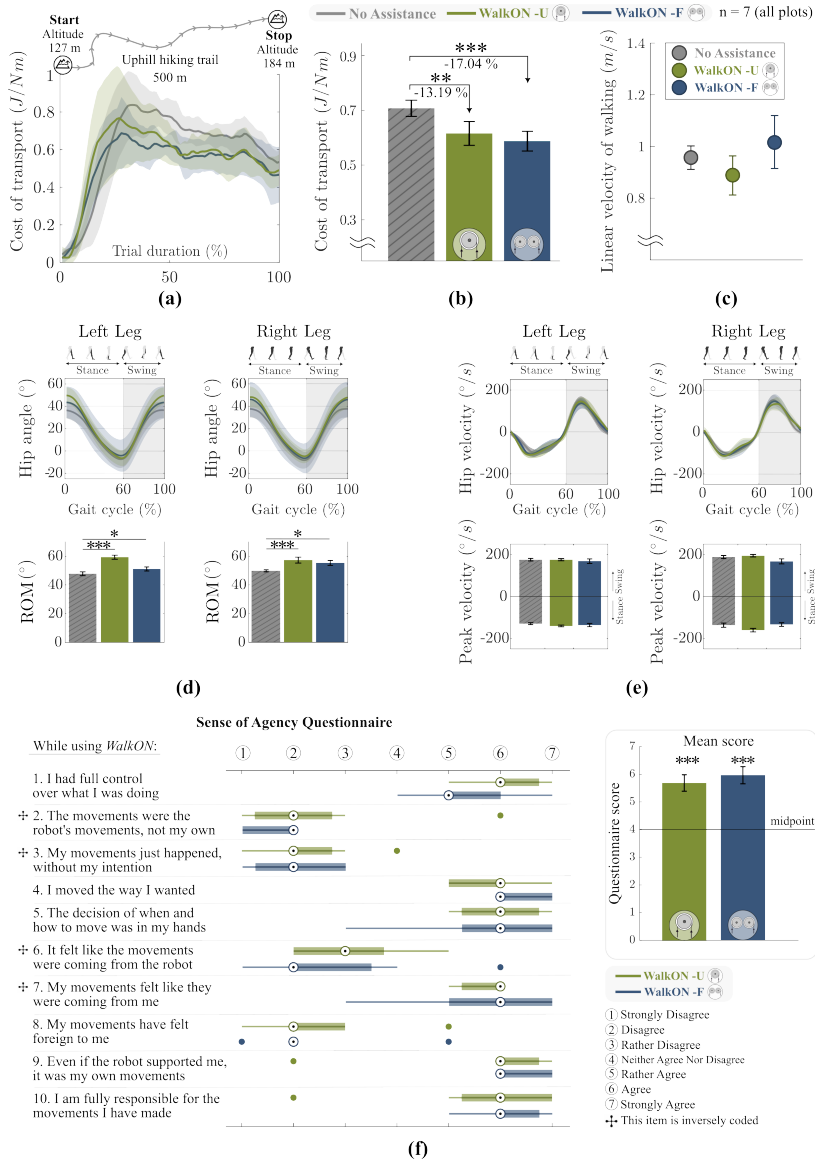

**Fig. 4 Uphill outdoor walking task results for young adults** (a) Cost of transport timeseries averaged across subjects normalized according to trial duration. (b) Mean cost of transport significantly reduced when using *WalkON*, with higher savings for *WalkON -F*. (c) The preferred walking speed along the trail was unaltered when using *WalkON*. (d) The hip range of motion exhibited a significant increase with either *WalkON -U* and *WalkON -F* compared to the *No Assistance* condition. (e) There were no significant variations in hip velocity peaks with both *WalkON* configurations compared to *No Assistance*. (f) The sense of agency assessment for young adults demonstrated that users perceived strong sense of control when using *WalkON* in both configurations. Grey colors indicate *No Assistance*, green *WalkON -U*, and navy *WalkON -F*. \*p < 0.05, \*\* p < 0.01, and p < 0.001.

range of motion across both legs and subjects was  $48.82^{\circ} \pm 0.68^{\circ}$  (mean  $\pm$  s.e.m.). This range significantly increased to  $58.40^{\circ} \pm 1.50^{\circ}$  when utilizing *WalkON -U* and to  $53.21^{\circ} \pm 1.32^{\circ}$  with *WalkON -F*. These findings reflect an average increase of  $+19.69 \pm 3.04\%$  ( $n = 7$ ,  $p < 0.001$ ) and  $+9.08 \pm 2.83\%$  ( $p < 0.05$ ) for the two robotic shorts configurations compared to the *No Assistance* condition (Fig. 4-(d)). The assistance provided by the device did not yield any significant alterations in hip peak velocities throughout the gait cycle, (Fig. 4-(e)).

For both *WalkON -U* and *WalkON -F*, young adults consistently indicated that their sense of agency remained almost intact during system usage (Fig. 4-(f)), reporting a mean score of  $5.67 \pm 0.30$  (mean  $\pm$  s.e.m.) with *WalkON -U* and  $5.93 \pm 0.31$  with *WalkON -F*. Both conditions resulted significantly higher ( $p$ -value  $< 0.001$ ) compared to a midpoint of 4 on the Likert scale, indicating neither agreement nor disagreement with the statements.

## Downhill hiking

The use of *WalkON* downhill did not significantly influenced the metabolic cost of transport (Fig. 5-(a, b)). The linear walking velocity exhibited a significant decrease with *WalkON -U* ( $n = 7$ ,  $p = 0.005$ ), but showed no significant change with *WalkON -F* (Fig. 5-(c)).

*WalkON* facilitated unrestricted, natural hip motion, as indicated by a significant ROM increase with both *WalkON* configurations. Specifically, in the *No Assistance* condition the average ROM across legs and participants was  $34.85^{\circ} \pm 1.02^{\circ}$ , which increased to  $41.55^{\circ} \pm 1.20^{\circ}$  with *WalkON -U* ( $+19.69 \pm 4.19\%$ ,  $p < 0.05$ ), and to  $38.92^{\circ} \pm 2.24^{\circ}$  with *WalkON -F* ( $+12.16 \pm 6.89\%$ ,  $p < 0.05$ ). Hip peak velocities remained unaffected by the devices.

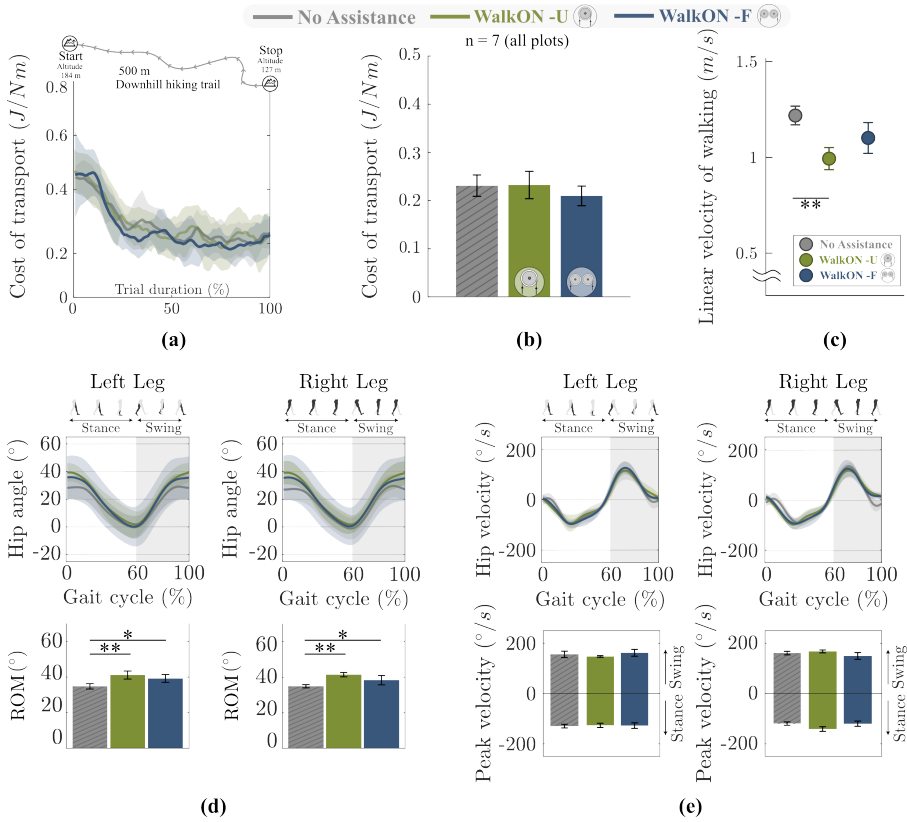

**Fig. 5 Downhill outdoor walking results for young adults** The task involved retracing back the 500m uphill hiking trail. Young adults walked at their preferred speed without assistance (*No Assistance* in grey), utilizing the *WalkON -U* device (in green), and the *WalkON -F* device (in navy). **(a, b)** The use of *WalkON* downhill did not impose a metabolic burden with either configurations. **(c)** The linear walking velocity exhibited a significant decrease with *WalkON -U*, but showed no significant change with *WalkON -F*. **(d, e)** The range of motion (ROM) of the hip joint significantly increased. Hip peak velocities remained unaffected by the devices. \* $p < 0.05$ , \*\*  $p < 0.01$ .

## Selection of the most efficient *WalkON* configuration

226

In this comparative study involving young adults, the utilization of the fully- 227  
 actuated version of *WalkON* (referred to as *WalkON -F*) led to higher 228  
 metabolic efficiency uphill, achieving a 17.04% saving, with individual out- 229  
 comes varying from 7.44% to 33.64%. On the other hand, the system in its 230  
 underactuated configuration, designated as *WalkON -U*, yielded lower results, 231  
 although it still enabled an average saving of 13.19%. 232

233 When assessing the kinematic effects, it was observed that *WalkON -U*  
234 induced a more substantial increase in the physiological range of motion,  
235 both uphill and downhill, while *WalkON -F* induced comparatively more  
236 modest changes in natural motion. The psycho-physical evaluation results,  
237 measured in terms of the sense of agency, showed no differences between the  
238 two configurations, yet higher scores were reported with *WalkON -F*.

239 It is conceivable that the superior performance of *WalkON -F* can be  
240 attributed to its ability to independently and accurately control each leg. This  
241 capability may enable a finer level of synchronization with the user's natu-  
242 ral walking pattern, especially in situations where the two legs need to move  
243 asymmetrically, as is often the case on sloped or uneven terrains. This charac-  
244 teristic likely played a crucial role, particularly on challenging terrains like the  
245 selected hiking path, where the two legs may have needed distinct movements  
246 to adjust to variations in slope and ground contours.

247 Given the enhanced performance of *WalkON -F* on the evaluated metrics,  
248 we have chosen this design configuration as the preferred option and final  
249 design of the assistive system to be tested with older adults.



# References

250

- [1] David Quintero, Daniel J Lambert, Dario J Villarreal, and Robert D 251  
Gregg. Real-time continuous gait phase and speed estimation from a single 252  
sensor. In *2017 IEEE Conference on Control Technology and Applications* 253  
(*CCTA*), pages 847–852. IEEE, 2017. 254
- [2] Greg Welch, Gary Bishop, et al. An introduction to the kalman filter. 255  
1995. 256
- [3] Michele Xiloyannis, Eugenio Annesse, Marco Canesi, Anil Kodiyan, Anto- 257  
nio Bicchi, Silvestro Micera, Arash Ajoudani, and Lorenzo Masia. Design 258  
and validation of a modular one-to-many actuator for a soft wearable 259  
exosuit. *Frontiers in neurorobotics*, 13:39, 2019. 260
- [4] Fausto A Panizzolo, Ignacio Galiana, Alan T Asbeck, Christopher Sivi, 261  
Kai Schmidt, Kenneth G Holt, and Conor J Walsh. A biologically-inspired 262  
multi-joint soft exosuit that can reduce the energy cost of loaded walking. 263  
*Journal of neuroengineering and rehabilitation*, 13(1):1–14, 2016. 264
- [5] Florian Leander Haufe, Kai Schmidt, Jaime Enrique Duarte, Peter Wolf, 265  
Robert Riener, and Michele Xiloyannis. Activity-based training with 266  
the myosuit: a safety and feasibility study across diverse gait disorders. 267  
*Journal of neuroengineering and rehabilitation*, 17:1–11, 2020. 268
- [6] Enrica Tricomi, Nicola Lotti, Francesco Missiroli, Xiaohui Zhang, Michele 269  
Xiloyannis, Thomas Müller, Simona Crea, Emese Papp, Jens Krzywinski, 270  
Nicola Vitiello, et al. Underactuated soft hip exosuit based on adaptive 271  
oscillators to assist human locomotion. *IEEE Robotics and Automation* 272  
*Letters*, 7(2):936–943, 2021. 273
- [7] Jinsoo Kim, Giuk Lee, Roman Heimgartner, Dheepak Arumukhom Revi, 274  
Nikos Karavas, Danielle Nathanson, Ignacio Galiana, Asa Eckert- 275  
Erdheim, Patrick Murphy, David Perry, et al. Reducing the metabolic 276

277 rate of walking and running with a versatile, portable exosuit. *Science*,  
278 365(6454):668–672, 2019.

279 [8] Alan T Asbeck, Kai Schmidt, and Conor J Walsh. Soft exosuit for hip  
280 assistance. *Robotics and Autonomous Systems*, 73:102–110, 2015.

281 [9] Enrica Tricomi, Mirko Mossini, Francesco Missiroli, Nicola Lotti, Xiao-  
282 hui Zhang, Michele Xiloyannis, Loris Roveda, and Lorenzo Masia.  
283 Environment-based assistance modulation for a hip exosuit via computer  
284 vision. *IEEE Robotics and Automation Letters*, 2023.

285 [10] MJ Myers and K Steudel. Effect of limb mass and its distribution on the  
286 energetic cost of running. *Journal of Experimental biology*, 116(1):363–  
287 373, 1985.

288 [11] M Kuster, S Sakurai, and GA Wood. Kinematic and kinetic comparison  
289 of downhill and level walking. *Clinical biomechanics*, 10(2):79–84, 1995.
